# Supplementary material
Source: PubMed Central journal article supplement (PMC5182015)
Supplement: 7101180020p1_ds002.pdf [file 7101180020p1_ds002.pdf]

## Supplemental Appendix 1

### Search Strategy for the Systematic Review

Database: Ovid MEDLINE(R) <1946 to April Week 1 2014>

- 1 exp Hand Injuries/ (15468)
- 2 exp Wrist Injuries/ (5065)
- 3 exp Forearm Injuries/ (9408)
- 4 exp Finger Injuries/ (7986)
- 5 “digital injuries”.mp. (36)
- 6 “thumb injuries”.mp. (45)
- 7 thumb reconstruction.mp. (312)
- 8 “toe to hand transfer”.mp. (106)
- 9 exp Carpal Tunnel Syndrome/ (6868)
- 10 “trigger finger”.mp. (451)
- 11 exp Dupuytren Contracture/ (2175)
- 12 DeQuervain’s tenosynovitis.mp. (6)
- 13 “extensor tendon rupture”.mp. (80)
- 14 exp Triangular Fibrocartilage/ (195)
- 15 “flexor tendon rupture”.mp. (59)
- 16 “gamekeepers thumb”.mp. (44)
- 17 “ulnar collateral ligament”.mp. (524)
- 18 “swan neck deformity”.mp. (115)
- 19 “boutonniere deformity”.mp. (104)
- 20 “mallet finger”.mp. (228)
- 21 exp Ulna Fractures/ or exp Radius Fractures/ (8357)
- 22 exp Colles’ Fracture/ (734)
- 23 multiple fractures hand.mp. (0)
- 24 wrist sprain.mp. (21)
- 25 wrist strain.mp. (1)
- 26 dislocated finger.mp. (2)
- 27 “crushing injury”.mp. (89)
- 28 “ulnar nerve syndrome”.mp. (4)
- 29 “radial tunnel syndrome”.mp. (81)
- 30 Kienbocks disease.mp. (522)
- 31 “repetitive strain injury”.mp. (145)
- 32 exp Nerve Compression Syndromes/ or “pronator teres syndrome”.mp. (18393)

33 camptodactyly.mp. (383)  
34 “carpal instability”.mp. (316)  
35 exp Elbowwith or exp Tennis Elbowwith or exp Elbow Joint/ (14784)  
36 brachial plexus injury.mp. (934)  
37 exp Brachial Plexus/in [Injuries] (4648)  
38 exp Elbowwith in [Injuries] (1262)  
39 exp Cubital Tunnel Syndrome/ (337)  
40 “bicipital tendonitis”.mp. (9)  
41 “medial epicondylitis”.mp. (75)  
42 “lateral epicondylitis”.mp. (516)  
43 “tenosynovitis elbow”.mp. (0)  
44 “biceps tendon rupture”.mp. (106)  
45 exp Radius Fractures/ or “radial head fracture”.mp. (7219)  
46 “ulnar collateral ligament strain”.mp. (2)  
47 elbow sprain.mp. (3)  
48 radial humeral sprain.mp. (0)  
49 exp Shoulder Joint/ or exp Shoulder/ or exp Shoulder Pain/ (23733)  
50 exp Axilla/ (9883)  
51 glenohumeral joint.mp. (1606)  
52 shoulder replacement.mp. (301)  
53 scapulothoracic articulation.mp. (35)  
54 exp Thoracic Outlet Syndrome/ (1879)  
55 exp Shoulder/in [Injuries] (1362)  
56 shoulder degenerative.mp. (5)  
57 adhesive capsulitis.mp. or exp Bursitis/ (3712)  
58 rotator cuff syndrome.mp. or exp Rotator Cuff/ (4822)  
59 shoulder tendonitis.mp. (14)  
60 bicipital tendonitis.mp. (9)  
61 subacromial bursitis.mp. (78)  
62 exp Shoulder Impingement Syndrome/ (1231)  
63 rotator cuff tear.mp. (1031)  
64 calcific shoulder.mp. (6)  
65 exp Shoulder Fractures/ or fracture anatomical head humerus.mp. (2268)  
66 upper arm.mp. (4494)  
67 treatment.mp. or exp Therapeutics/ (5323818)  
68 exp Rehabilitation/ (146881)  
69 interventions.mp. (214828)

- 70 therapy.mp. (1673044)
- 71 exp Occupational Therapy/ (10034)
- 72 exp Exercise/ (116601)
- 73 physical agent modalities.mp. (14)
- 74 exp Physical Therapy Modalities/ (122009)
- 75 physical therapy.mp. (34208)
- 76 exp Sports Medicine/ (9233)
- 77 athletic training.mp. (457)
- 78 body mechanics.mp. (168)
- 79 ergonomics.mp. or exp Human Engineering/ (45425)
- 80 relaxation techniques.mp. or exp Relaxation Therapy/ (7470)
- 81 exp Biofeedback, Psychology/ (7664)
- 82 exp Primary Prevention/ (110567)
- 83 functional training.mp. (204)
- 84 exp “Activities of Daily Living”/ (50557)
- 85 adaptive equipment.mp. (88)
- 86 work hardening.mp. (113)
- 87 work conditioning.mp. (19)
- 88 industrial rehabilitation.mp. (95)
- 89 exp Occupational Medicine/ (21692)
- 90 energy conservation.mp. (1226)
- 91 cognitive behavior therapy.mp. or exp Cognitive Therapy/ (15654)
- 92 job coaching.mp. (10)
- 93 job modification.mp. (23)
- 94 job retraining.mp. (14)
- 95 exp Rehabilitation, Vocational/ or occupational rehabilitation.mp. (9224)
- 96 preprosthetic training.mp. (4)
- 97 prosthetic training.mp. (68)
- 98 edema control.mp. (49)
- 99 therapeutic management.mp. (5189)
- 100 joint protection.mp. (154)
- 101 scapulohumeral rhythm.mp. (52)
- 102 exp Orthotic Devices/ (9323)
- 103 hand therapy.mp. (269)
- 104 exp Health Promotion/ (53287)
- 105 exp Adaptation, Physiological/ (96424)
- 106 back school.mp. (188)

107 driving adaptations.mp. (2)  
108 assistive technology.mp. or exp Self-Help Devices/ (8451)  
109 home modification.mp. (49)  
110 exp Motivational Interviewing/ (232)  
111 lifestyle redesign.mp. (7)  
112 therapeutic activity.mp. (2663)  
113 exp Pain Management/ (16674)  
114 exp Return to Work/ (329)  
115 disability.mp. (142693)  
116 level of independence.mp. (310)  
117 exp Absenteeism/ (7257)  
118 physical mobility.mp. (376)  
119 exp Work Capacity Evaluation/ (5097)  
120 exp "Quality of Life"/ (115490)  
121 exp Adaptation, Psychological/ or coping patterns.mp. (101266)  
122 exp "Prostheses and Implants"/ut [Utilization] (1548)  
123 exp Pain/ (302112)  
124 dysfunction.mp. (262934)  
125 sickness.mp. (27405)  
126 exp Fatigue/ (19944)  
127 exp Physical Endurance/ (24073)  
128 tolerance to activity.mp. (109)  
129 strength.mp. (170732)  
130 dynamometry.mp. (843)  
131 exp "Range of Motion, Articular"/ (32514)  
132 exp Electromyography/ (67425)  
133 exp Neural Conduction/ or ncv.mp. (29748)  
134 exp Pinch Strength/ (153)  
135 exp Hand Strength/ or grip strength.mp. (12666)  
136 exp Sensation/ (229902)  
137 coordination.mp. (49131)  
138 exp Muscle Weakness/ or weakness.mp. (36484)  
139 volumetric measurement.mp. (310)  
140 circumferential measurement.mp. (25)  
141 exp Depression/ (74617)  
142 exp Anxiety/ (54741)  
143 exp Stress, Psychological/ or psychological distress.mp. (96355)

144 exp Fear/ (25368)

145 symptom magnification.mp. (21)

146 occupational stress.mp. (1192)

147 occupational engagement.mp. (50)

148 occupational performance.mp. (534)

149 mobility.mp. (103431)

150 hand function.mp. (2246)

151 fine motor coordination.mp. (145)

152 patient reported outcomes.mp. (2030)

153 exp Child Care/ (19398)

154 family engagement.mp. (62)

155 community mobility.mp. (90)

156 exp Social Participation/ (488)

157 exp Leisure Activities/ (161649)

158 exp Rest/ (12260)

159 exp Sleep/ (59850)

160 1 or 2 or 3 or 4 or 5 or 6 or 7 or 8 or 9 or 10 or 11 or 12 or 13 or 14 or 15 or 16 or 17 or 18 or 19 or 20 or 21 or 22 or 23 or 24 or 25 or 26 or 27 or 28 or 29 or 30 or 31 or 32 or 33 or 34 or 35 or 36 or 37 or 38 or 39 or 40 or 41 or 42 or 43 or 44 or 45 or 46 or 47 or 48 or 49 or 50 or 51 or 52 or 53 or 54 or 55 or 56 or 57 or 58 or 59 or 60 or 61 or 62 or 63 or 64 or 65 or 66 (108416) 161 114 or 115 or 116 or 117 or 118 or 119 or 120 or 121 or 122 or 123 or 124 or 125 or 126 or 127 or 128 or 129 or 130 or 131 or 132 or 133 or 134 or 135 or 136 or 137 or 138 or 139 or 140 or 141 or 142 or 143 or 144 or 145 or 146 or 147 or 148 or 149 or 150 or 151 or 152 or 153 or 154 or 155 or 156 or 157 or 158 or 159 (1778709) 162 67 or 68 or 69 or 71 or 72 or 73 or 74 or 75 or 76 or 77 or 78 or 79 or 80 or 81 or 82 or 83 or 84 or 85 or 86 or 87 or 88 or 89 or 90 or 91 or 92 or 93 or 94 or 95 or 96 or 97 or 98 or 99 or 100 or 101 or 102 or 103 or 104 or 106 or 107 or 108 or 109 or 110 or 111 or 112 or 113 (5629075)

163 160 and 161 and 162 (16094)

164 limit 163 to (english language and yr="2006 -Current"; 6966)

*Suggested citation:* Marik, T. L., & Roll, S. C. (2017). Effectiveness of occupational therapy interventions for musculoskeletal shoulder conditions: A systematic review (Suppl. Appendix 1). *American Journal of Occupational Therapy*, 71, 7101180020. <https://doi.org/10.5014/ajot.2017.023127>
